# Supplementary material for: Sequential ChIP-bisulfite sequencing enables direct genome-scale investigation of chromatin and DNA methylation cross-talk
Source: HighWire-hosted journal article supplement (doi:10.1101/gr.133728.111), 2012-03-30
Supplement: SuppLegends.docx [file SuppLegends.docx]

**Supplementary Figure 1.** (**A**) Scatter-plot showing MethylCap versus MethylCap-BS-seq read densities within 5 kb windows covering the genome. (**B**) Additional examples of normal MethylCap-seq and MethylCap-BS-seq data of normal (N) and tumor (T) colon tissues. Per covered CpG, percentage methylation as derived from the MethylCap-BS-seq data is indicated in color. (**C**) Histograms showing the distribution of methylation in MethylCap peaks, as derived from MethylCap-BS-seq of normal and colon tissue.

**Supplementary Figure 2.** (**A**) Scatter-plot showing H3K27me3 ChIP-seq versus ChIP-BS-seq read densities within 5 kb windows covering the genome. (**B**) Bisulfite sequencing of individual PCR fragments amplified from genomic DNA from either untreated or crosslinked/decrosslinked cells (SKNO-1) as in ChIP. CpGs were sequenced to a median coverage of over 300-fold (see Methods). (**C**) Example of H3K27me3 ChIP-BS-seq data of HCT116 cells, showing DNA methylation throughout H3K27me3 BLOCs. Percentage methylation is color coded. (**D**) Examples of H3K27me3 ChIP-BS-seq data of HCT116 cells, displaying DNA hypomethylation within H3K27me3-enriched CpG islands. (**E**) Histograms showing the distribution of methylation in 300 bp windows throughout H3K27me3 enriched regions, as established from H3K27me3 ChIP-BS-seq results. Windows were categorized according to CpG density.

**Supplementary Figure 3.** (**A**) Boxplot showing expression levels of genes contained within H3K27me3 BLOCs and genes outside BLOCs. RPKM, Reads Per Kilobase of exon model per Million mapped reads. The p-value was calculated using the Mann-Whitney *U* test. (**B**) Density plot showing the distribution of H3K27me3 BLOCs sizes. (**C**)Upper panel, 0.7-Mb overview of the genome-wide H3K27me3 ChIP-seq and MethylCap-seq data of HCT116 cells. Positions of H3K27me3 BLOCs and MethylCap peaks are indicated as red and blue rectangles, respectively. RNA-seq data are included (black profile). Middle and lower panel, additional examples of H3K27me3 ChIP-seq and MethylCap–seq data demonstrating hypermethylated CpG islands within H3K27me3 BLOCs, and concomitant local depletion of H3K27me3. (**D**) Boxplot showing that MethylCap peaks are not associated with DNaseI hypersensitivity. DNaseI hypersensitivity was measured within DNaseI peaks (defined by ENCODE), MethylCap peaks and random genomic regions of equal size. DNaseI-seq data for HCT116 cells were retrieved from ENCODE (DNaseI Hypersensitivity by Digital DNaseI from ENCODE/University of Washington).

**Supplementary Figure 4.** (**A**) Density plot showing the length distribution of H3K27me3 BLOCs and localized H3K27me3 peaks in mES cells. (**B**) Genomic distribution of localized H3K27me3 peaks in mES cells. TSS, transcription start sites (here defined the region from -500 to +500 bp).

**Supplementary Figure 5.** H3K9me3 peaks of mES cells are associated with DNA hypermethylation. (**A**) Screenshots of H3K9me3 peaks (orange) at *H19* and the *Meg3* and *Gbr10* genes. The H3K9me3 peak upstream of *H19* colocalizes with the imprinting control region (ICR) upstream of *H19* (Bell and Felsenfeld 2000; Hark et al. 2000; Kanduri et al. 2000). Per covered CpG, percentage methylation as derived from the H3K9-BS-seq data is indicated in color. (**B**) Histograms showing the distribution of methylation in 300 bp windows through peaks of H3K9me3 in wild-type mES cells, and peaks of H3K27me3 in wild-type and TKO mES cells, as inferred from ChIP-BS-seq.

**Supplementary Figure 6.** ChIP-qPCR validation of observed changes in H3K27me3 peaks (decrease) and H3K27me3 BLOCs (increase) in TKO mES cells.

**Supplementary Figure 7.** Megabase-scale genome profiles reveal resemblance between H3K27me3 of TKO mES cells and MethylCap DNA methylation of wild-type mES cells. A 0.5-Mb windowing was applied over the complete mouse genome, and read counts within these windows were calculated to generate megabase-scale profiles for H3K27me3 and MethylCap. (**A**) Profiles for chromosomes 1, 3, and 10. Grey highlights represent regions with highest correlation between H3K27me3-TKO and MethylCap-wild-type (increase of at least 0.4, to a minimum of 0.8, Pearson correlation). (**B**) Example of a 36-Mb region in chr10qD, as indicated by the red arrow in (A). (**C**) Overall Pearson correlation between megabase-scale genome profiles.

**Supplementary Figure 8.** (**A**) Boxplot of gene expression changes in wild-type and TKO mES cells, inside and outside of H3K27me3 BLOCs. RPKM, Reads Per Kilobase of exon model per Million mapped reads. (**B**) MA-plots of gene expression changes in TKO relative to wild-type mES cells. Blue, unchanged genes; red, upregulated genes; green, downregulated genes. Deregulated genes were detected using the DESeq package (Anders and Huber 2010) at an FDR of 0.05 and with an additional threshold of 2-fold change.
